# Supplementary material
Source: PubMed Central journal article supplement (PMC8291746)

## **Geminal Repulsion Disrupts Diels–Alder Reactions of Geminally Substituted Cyclopentadienes and 4*H*-Pyrazoles**

Brian J. Levandowski,\* Nile S. Abularrage, and Ronald T. Raines\*

*Department of Chemistry, Massachusetts Institute of Technology, Cambridge, Massachusetts 02139, United States*

---

| <b>Content</b>                                                                                                                  | <b>Page</b> |
|---------------------------------------------------------------------------------------------------------------------------------|-------------|
| Table of Contents                                                                                                               | S1          |
| M06-2X/6-31+G(d) Optimized Coordinates<br>and M06-2X/6-311++G(d,p) Gibbs Free Energies ( <i>G</i> ) and Enthalpies ( <i>H</i> ) | S2          |
| Kinetic Traces                                                                                                                  | S12         |
| NMR Spectra                                                                                                                     | S13         |

---

**M06-2X/6-31+G(d) Optimized Coordinates  
and M06-2X/6-311++G(d,p) Gibbs Free Energies**

**Ethylene**

|   |             |             |            |
|---|-------------|-------------|------------|
| C | 0.00000000  | 0.66519200  | 0.00000000 |
| H | 0.92502300  | 1.23512000  | 0.00000000 |
| H | -0.92498400 | 1.23516200  | 0.00000000 |
| C | 0.00000000  | -0.66519200 | 0.00000000 |
| H | -0.92502300 | -1.23512000 | 0.00000000 |
| H | 0.92498400  | -1.23516200 | 0.00000000 |

*G*: -78.533482

*H*: -78.507974

**Cyclopentadiene**

|   |             |             |             |
|---|-------------|-------------|-------------|
| C | 0.01190700  | 1.21588100  | -0.00040000 |
| C | -1.17508100 | 0.29332700  | 0.00037800  |
| C | 1.18062500  | 0.27034800  | 0.00021200  |
| H | 2.21681800  | 0.58775100  | 0.00079200  |
| H | -2.20488300 | 0.63085700  | -0.00009200 |
| H | 0.01799900  | 1.87482700  | -0.87997400 |
| H | 0.01861900  | 1.87389400  | 0.87983900  |
| C | -0.74497200 | -0.98278600 | 0.00007800  |
| H | -1.36963500 | -1.86920600 | -0.00044800 |
| C | 0.72563400  | -0.99714100 | -0.00020100 |
| H | 1.33240700  | -1.89589700 | -0.00052400 |

*G*: -193.991995

*H*: -193.960317

**Cyclopentadiene + Ethylene TS**

|   |             |             |             |
|---|-------------|-------------|-------------|
| C | 0.36698800  | 0.00003400  | 1.32487500  |
| C | 0.45985500  | 1.15459300  | 0.36203400  |
| C | 1.17857400  | 0.70337200  | -0.74264800 |
| C | 0.45966900  | -1.15459100 | 0.36209700  |
| C | 1.17847400  | -0.70354000 | -0.74260300 |
| C | -1.61292700 | 0.69144700  | -0.33531700 |
| C | -1.61301600 | -0.69134300 | -0.33526600 |
| H | -2.05012000 | 1.23951900  | 0.49468100  |
| H | -2.05025200 | -1.23926500 | 0.49480700  |
| H | 0.39103900  | -2.19306100 | 0.66958700  |
| H | 1.55701100  | -1.33052600 | -1.54273900 |
| H | 1.55719800  | 1.33025100  | -1.54282800 |
| H | 0.39130000  | 2.19309200  | 0.66944000  |
| H | -1.54332300 | -1.24162000 | -1.26672000 |
| H | -1.54319600 | 1.24167200  | -1.26679800 |

|   |             |             |            |
|---|-------------|-------------|------------|
| H | -0.49703200 | 0.00013200  | 1.99113700 |
| H | 1.28167700  | -0.00002500 | 1.94039900 |

*G*: -272.477148

*H*: -272.440793

### Cyclopentadiene + Ethylene Adduct

|   |             |             |             |
|---|-------------|-------------|-------------|
| C | -0.03020600 | 0.00031000  | 1.37650100  |
| C | -0.08570300 | -1.12552400 | 0.32451400  |
| C | -0.08458400 | 1.12569700  | 0.32407600  |
| C | 1.18074900  | -0.77844100 | -0.52124700 |
| C | 1.18170300  | 0.77724400  | -0.52129800 |
| H | 2.07969400  | -1.17467900 | -0.03745800 |
| H | 2.08082600  | 1.17261600  | -0.03694000 |
| H | -0.11385300 | 2.15344200  | 0.69091000  |
| H | -0.11563300 | -2.15310200 | 0.69176500  |
| H | 1.12793600  | 1.20226400  | -1.52701200 |
| H | 1.12612900  | -1.20347800 | -1.52697600 |
| H | 0.89768800  | -0.00003800 | 1.96086100  |
| H | -0.89577900 | 0.00089200  | 2.04486700  |
| C | -1.27675600 | -0.66917600 | -0.50010800 |
| H | -1.92166500 | -1.32553200 | -1.07573200 |
| C | -1.27606500 | 0.67002500  | -0.50041000 |
| H | -1.92016700 | 1.32680900  | -1.07644300 |

*G*: -272.544735

*H*: -272.510120

### 5,5-Dimethylcyclopentadiene

|   |             |             |             |
|---|-------------|-------------|-------------|
| C | 0.54613900  | 0.00000000  | 0.00000000  |
| C | -0.40673800 | -1.17241000 | 0.00000000  |
| C | -0.40673800 | 1.17241000  | 0.00000000  |
| H | -0.06990300 | 2.20468000  | -0.00000100 |
| H | -0.06990300 | -2.20468000 | 0.00000000  |
| C | -1.67860400 | 0.73704500  | 0.00000000  |
| H | -2.57109400 | 1.35350600  | 0.00000000  |
| C | -1.67860400 | -0.73704500 | 0.00000000  |
| H | -2.57109400 | -1.35350600 | 0.00000000  |
| C | 1.42720900  | 0.00000000  | -1.26158600 |
| H | 2.07054700  | -0.88673300 | -1.27900600 |
| H | 0.81028800  | -0.00000100 | -2.16535100 |
| H | 2.07054700  | 0.88673200  | -1.27900700 |
| C | 1.42720900  | 0.00000000  | 1.26158600  |
| H | 2.07054700  | -0.88673200 | 1.27900700  |
| H | 2.07054700  | 0.88673300  | 1.27900600  |
| H | 0.81028800  | 0.00000100  | 2.16535100  |

*G*: -272.547797

*H*: -272.509996

**5,5-Dimethylcyclopentadiene + Ethylene TS**

|   |             |             |             |
|---|-------------|-------------|-------------|
| C | -0.80997200 | -0.27391900 | -0.00012100 |
| C | -0.05764800 | 0.37213300  | -1.14991900 |
| C | 0.40565900  | 1.60573000  | -0.70411300 |
| C | -0.05793200 | 0.37203100  | 1.14988800  |
| C | 0.40551800  | 1.60565800  | 0.70435700  |
| C | -2.25790300 | 0.30446700  | -0.00015400 |
| H | -2.80041100 | -0.04665300 | -0.88461400 |
| H | -2.79987600 | -0.04516400 | 0.88522500  |
| H | -2.25195900 | 1.39573700  | -0.00106100 |
| C | 1.82906200  | -0.78424700 | -0.69051600 |
| C | 1.82909600  | -0.78421900 | 0.69048500  |
| H | 1.49390000  | -1.65123900 | -1.25232100 |
| H | 1.49398500  | -1.65117000 | 1.25239000  |
| H | -0.26755900 | 0.13013000  | 2.18909800  |
| H | 0.81934200  | 2.38611900  | 1.33379900  |
| H | 0.81960400  | 2.38626800  | -1.33338000 |
| H | -0.26719400 | 0.13060400  | -2.18923300 |
| H | 2.47858100  | -0.10929300 | 1.23586700  |
| H | 2.47863800  | -0.10950700 | -1.23602000 |
| C | -0.96856200 | -1.79442500 | 0.00003400  |
| H | -1.53831000 | -2.10802100 | -0.88236600 |
| H | -0.02579200 | -2.33931500 | -0.00055400 |
| H | -1.53685200 | -2.10774600 | 0.88352100  |

*G*: -351.027574

*H*: -350.985654

**5,5-Dimethylcyclopentadiene + Ethylene Adduct**

|   |             |             |             |
|---|-------------|-------------|-------------|
| C | 0.83721900  | -0.00616200 | -0.00002200 |
| C | -0.23897100 | 0.09482600  | 1.12207900  |
| C | -1.02159200 | 1.31473400  | 0.66940300  |
| C | -0.23892700 | 0.09516000  | -1.12202200 |
| C | -1.02154300 | 1.31500700  | -0.66897200 |
| C | 1.85112000  | 1.14187800  | 0.00001100  |
| H | 2.49741200  | 1.07415200  | 0.88336900  |
| H | 2.49659700  | 1.07450400  | -0.88396700 |
| H | 1.37546000  | 2.12366900  | 0.00047200  |
| C | -1.16875800 | -1.11240500 | 0.77815500  |
| C | -1.16895000 | -1.11199000 | -0.77850100 |
| H | -0.77168900 | -2.04798900 | 1.18406500  |
| H | -0.77256100 | -2.04759300 | -1.18495100 |
| H | 0.13294700  | 0.10673000  | -2.15065600 |
| H | -1.56501200 | 1.98561000  | -1.32705400 |

|   |             |             |             |
|---|-------------|-------------|-------------|
| H | -1.56522600 | 1.98512100  | 1.32757500  |
| H | 0.13295900  | 0.10594200  | 2.15068700  |
| H | -2.16854700 | -0.97026500 | -1.19748900 |
| H | -2.16820800 | -0.97137000 | 1.19762800  |
| C | 1.63534000  | -1.31347300 | -0.00005200 |
| H | 2.28285000  | -1.35540900 | 0.88414200  |
| H | 1.01920300  | -2.21388400 | -0.00101800 |
| H | 2.28418400  | -1.35465700 | -0.88327600 |

*G*: -351.099675

*H*: -351.059216

### 2,3-Diazacyclopentadiene

|   |             |             |             |
|---|-------------|-------------|-------------|
| C | 0.00000000  | -1.19041000 | 0.00000000  |
| C | 0.00000000  | -0.20408700 | -1.12456600 |
| C | 0.00000000  | -0.20408700 | 1.12456600  |
| H | 0.00000000  | -0.43655900 | 2.18409900  |
| H | 0.00000000  | -0.43655900 | -2.18409900 |
| N | 0.00000000  | 1.01006400  | 0.71717000  |
| N | 0.00000000  | 1.01006400  | -0.71717000 |
| H | -0.88517500 | -1.83813900 | 0.00000000  |
| H | 0.88517600  | -1.83813900 | 0.00000000  |

*G*: -226.084086

*H*: -226.052802

### 2,3-Diazacyclopentadiene + Ethylene TS

|   |             |             |             |
|---|-------------|-------------|-------------|
| C | -0.57920200 | -0.00037100 | 1.26549800  |
| C | -0.52409800 | -1.10756200 | 0.25666300  |
| C | -0.52500900 | 1.10733500  | 0.25721300  |
| C | 1.59576000  | -0.69010900 | -0.15868400 |
| C | 1.59554800  | 0.69073800  | -0.15885900 |
| H | 1.92219700  | -1.23924600 | 0.72062700  |
| H | 1.92177100  | 1.24033800  | 0.72024100  |
| H | -0.54790000 | 2.16988500  | 0.47333900  |
| H | -0.54683600 | -2.17018600 | 0.47245800  |
| H | 1.61778200  | 1.23936500  | -1.09346300 |
| H | 1.61859800  | -1.23892000 | -1.09316500 |
| H | 0.17647400  | -0.00020300 | 2.04900800  |
| H | -1.58061400 | -0.00092800 | 1.72683900  |
| N | -0.99731300 | 0.66877200  | -0.91034500 |
| N | -0.99689700 | -0.66881300 | -0.91063700 |

*G*: -304.570333

*H*: -304.534433

### 2,3-Diazacyclopentadiene + Ethylene Adduct

|   |             |             |             |
|---|-------------|-------------|-------------|
| C | -0.31829000 | 0.00127200  | 1.34421200  |
| C | -0.17095900 | -1.09421100 | 0.28823700  |
| C | -0.16874100 | 1.09502600  | 0.28716000  |
| C | 1.21890700  | -0.77704500 | -0.32594800 |
| C | 1.22026500  | 0.77486000  | -0.32696400 |
| H | 2.01212800  | -1.18933400 | 0.30339500  |
| H | 2.01467600  | 1.18647100  | 0.30147900  |
| H | -0.35199600 | 2.13470900  | 0.55195900  |
| H | -0.35520300 | -2.13332500 | 0.55466700  |
| H | 1.31654200  | 1.20316500  | -1.32719400 |
| H | 1.31500400  | -1.20673900 | -1.32567200 |
| N | -1.13088600 | -0.62039000 | -0.75541600 |
| N | -1.13016100 | 0.62072400  | -0.75619700 |
| H | 0.48398000  | 0.00076900  | 2.08672000  |
| H | -1.29490000 | 0.00253500  | 1.83574500  |

*G*: -304.639135

*H*: -304.604891

#### 5,5-Dimethyl-2,3-diazacyclopentadiene

|   |             |             |             |
|---|-------------|-------------|-------------|
| C | 0.53141500  | 0.00000000  | 0.00000000  |
| C | -0.47067000 | -0.00000900 | 1.11844000  |
| C | -0.47067000 | 0.00000900  | -1.11844000 |
| H | -0.22957800 | 0.00001700  | -2.17852500 |
| H | -0.22957800 | -0.00001700 | 2.17852500  |
| C | 1.39996100  | -1.26878500 | -0.00001000 |
| H | 2.04243300  | -1.28578000 | 0.88613300  |
| H | 0.78186100  | -2.17109800 | -0.00001700 |
| H | 2.04243300  | -1.28576700 | -0.88615200 |
| C | 1.39996100  | 1.26878500  | 0.00001000  |
| H | 2.04243300  | 1.28576700  | 0.88615200  |
| H | 2.04243300  | 1.28578000  | -0.88613300 |
| H | 0.78186100  | 2.17109800  | 0.00001700  |
| N | -1.68673400 | 0.00000600  | -0.72056500 |
| N | -1.68673400 | -0.00000600 | 0.72056500  |

*G*: -304.64065

*H*: -304.602863

#### 5,5-Dimethyl-2,3-diazacyclopentadiene + Ethylene TS

|   |            |             |             |
|---|------------|-------------|-------------|
| C | 0.81200800 | 0.29193500  | -0.00000400 |
| C | 0.04843100 | -0.39842000 | -1.10270400 |
| C | 0.04842500 | -0.39840300 | 1.10270300  |
| C | 2.25374000 | -0.30110300 | 0.00000500  |
| H | 2.79534300 | 0.04581200  | -0.88559000 |
| H | 2.79535300 | 0.04586100  | 0.88557400  |
| H | 2.23962600 | -1.39293100 | 0.00003400  |

|   |             |             |             |
|---|-------------|-------------|-------------|
| C | -1.84866300 | 0.67946400  | -0.68949500 |
| C | -1.84864800 | 0.67948800  | 0.68949300  |
| H | -1.53924800 | 1.55769800  | -1.24988900 |
| H | -1.53921500 | 1.55774300  | 1.24984700  |
| H | 0.21597000  | -0.25239000 | 2.16667300  |
| H | 0.21597700  | -0.25242100 | -2.16667600 |
| H | -2.45515600 | -0.03451600 | 1.23432300  |
| H | -2.45517600 | -0.03456700 | -1.23428500 |
| C | 0.94054900  | 1.81008300  | -0.00001100 |
| H | -0.01671000 | 2.33078600  | -0.00009800 |
| H | 1.50228000  | 2.13553000  | 0.88242100  |
| H | 1.50242500  | 2.13550900  | -0.88235800 |
| N | -0.40689300 | -1.57288900 | -0.67103200 |
| N | -0.40689600 | -1.57287900 | 0.67104700  |

*G*: -383.123567

*H*: -383.081911

#### **5,5-Dimethyl-2,3-diazacyclopentadiene + Ethylene Adduct**

|   |             |             |             |
|---|-------------|-------------|-------------|
| C | -0.83310300 | 0.10859100  | -0.00001900 |
| C | 0.22878800  | -0.14301400 | 1.09098900  |
| C | 0.22871800  | -0.14307200 | -1.09098200 |
| C | -1.96791200 | -0.92026400 | -0.00000300 |
| H | -2.60037800 | -0.78281300 | 0.88417600  |
| H | -2.60026500 | -0.78281100 | -0.88426600 |
| H | -1.60285700 | -1.94945300 | 0.00002600  |
| C | 1.33317600  | 0.90098100  | 0.77594400  |
| C | 1.33318100  | 0.90088800  | -0.77607900 |
| H | 1.08043800  | 1.87711500  | 1.19748400  |
| H | 1.08060500  | 1.87702400  | -1.19767500 |
| H | -0.08978400 | -0.21258600 | -2.13188900 |
| H | -0.08970000 | -0.21235400 | 2.13190700  |
| H | 2.28967400  | 0.58756000  | -1.20076700 |
| H | 2.28968900  | 0.58783900  | 1.20068300  |
| C | -1.44468900 | 1.50846000  | 0.00002100  |
| H | -2.08083300 | 1.63762000  | 0.88318200  |
| H | -0.70796200 | 2.31379600  | -0.00032300 |
| H | -2.08138700 | 1.63745800  | -0.88275800 |
| N | 0.84602100  | -1.41807000 | 0.62128100  |
| N | 0.84595100  | -1.41819000 | -0.62113800 |

*G*: -383.123567

*H*: -383.155418

#### **5-Methyl-5-tert-butylcyclopentadiene**

|   |             |            |             |
|---|-------------|------------|-------------|
| C | -0.25455300 | 0.46841800 | 0.01023500  |
| C | -1.12619500 | 0.08679100 | -1.16843700 |

|   |             |             |             |
|---|-------------|-------------|-------------|
| C | -1.12779600 | 0.04711000  | 1.17443200  |
| H | -0.84377200 | 0.18791200  | 2.21209600  |
| H | -0.83273200 | 0.24526100  | -2.20159800 |
| C | -2.29417100 | -0.45136300 | 0.72928400  |
| H | -3.11919500 | -0.80136800 | 1.34060600  |
| C | -2.29225000 | -0.42856900 | -0.74288200 |
| H | -3.11236400 | -0.76674200 | -1.36720500 |
| C | -0.11007000 | 2.00751400  | 0.02969000  |
| H | 0.36114700  | 2.37302800  | -0.88719900 |
| H | -1.10083400 | 2.46537400  | 0.10734000  |
| H | 0.48799800  | 2.34472100  | 0.88234800  |
| C | 1.13482600  | -0.26798500 | -0.00436100 |
| C | 2.04526700  | 0.31206300  | -1.09594600 |
| H | 2.37526200  | 1.32837100  | -0.85652100 |
| H | 2.94170300  | -0.31082500 | -1.19609500 |
| H | 1.54745600  | 0.33437300  | -2.07225600 |
| C | 1.84564000  | -0.12204200 | 1.34951200  |
| H | 2.86286100  | -0.52412900 | 1.27614100  |
| H | 1.92903900  | 0.92338200  | 1.66563100  |
| H | 1.32653000  | -0.67908400 | 2.13624500  |
| C | 0.93198500  | -1.76520000 | -0.28055700 |
| H | 0.61010900  | -1.94351900 | -1.31127800 |
| H | 1.87338200  | -2.30468100 | -0.12290400 |
| H | 0.17731400  | -2.19249100 | 0.38882700  |

G: -390.378106

H: -390.332444

### 5-Methyl-5-*tert*-butylcyclopentadiene + Ethylene TS

|   |             |             |             |
|---|-------------|-------------|-------------|
| C | -0.01820400 | -0.38695700 | 0.01182400  |
| C | 0.69166100  | 0.28783800  | -1.15361700 |
| C | 1.05748500  | 1.56897400  | -0.75024000 |
| C | 0.68884300  | 0.35857400  | 1.13774700  |
| C | 1.05095600  | 1.61401700  | 0.65379400  |
| C | -1.58775400 | -0.00283500 | 0.00618700  |
| C | 2.65655300  | -0.67022500 | -0.67110100 |
| C | 2.69061800  | -0.57002500 | 0.71009300  |
| H | 2.40970700  | -1.61038600 | -1.15558100 |
| H | 2.49996900  | -1.43009900 | 1.34438400  |
| H | 0.52089900  | 0.13332700  | 2.18740000  |
| H | 1.41024000  | 2.43945000  | 1.25985600  |
| H | 1.41631800  | 2.35596800  | -1.40532300 |
| H | 0.51674900  | -0.00146000 | -2.18734900 |
| H | 3.27105900  | 0.21515200  | 1.18125200  |
| H | 3.23073100  | 0.01836100  | -1.27993000 |
| C | 0.07200500  | -1.92231600 | 0.02691500  |
| H | -0.11266000 | -2.32199000 | -0.97559900 |



|   |             |             |             |
|---|-------------|-------------|-------------|
| H | 1.04456700  | -2.28584600 | 0.34789800  |
| H | -0.66918600 | -2.36625300 | 0.69580700  |
| C | -2.31944300 | -0.85621400 | -1.04768900 |
| H | -2.35623800 | -1.91627700 | -0.78277400 |
| H | -3.35405100 | -0.50758800 | -1.14063200 |
| H | -1.84987200 | -0.76442400 | -2.03410300 |
| C | -2.20437100 | -0.28563400 | 1.38827600  |
| H | -3.29652400 | -0.21472300 | 1.32333800  |
| H | -1.96544000 | -1.28193700 | 1.77214100  |
| H | -1.86799500 | 0.45160600  | 2.12475100  |
| C | -1.91185600 | 1.46348800  | -0.32250500 |
| H | -1.43383800 | 2.16254000  | 0.36637300  |
| H | -1.61634400 | 1.73398200  | -1.34016500 |
| H | -2.99705600 | 1.59849400  | -0.23985300 |

G: -468.848043

H: -468.798963

### 5-Methyl-5-*tert*-butylcyclopentadiene + Ethylene Adduct

|   |             |             |             |
|---|-------------|-------------|-------------|
| C | -0.01230000 | -0.44824500 | 0.01147700  |
| C | 0.91167500  | 0.10207200  | -1.12383000 |
| C | 1.12499800  | 1.54068000  | -0.69397900 |
| C | 0.92883200  | 0.13935000  | 1.11847000  |
| C | 1.11786200  | 1.56752400  | 0.64205200  |
| C | -1.50872200 | 0.06540300  | 0.00750400  |
| C | 2.27087900  | -0.59032200 | -0.78270800 |
| C | 2.30453000  | -0.52496400 | 0.77203700  |
| H | 2.29574100  | -1.62168000 | -1.14774100 |
| H | 2.41646200  | -1.51365900 | 1.22581600  |
| H | 0.61725900  | 0.00249500  | 2.15677400  |
| H | 1.33167700  | 2.41525200  | 1.28597700  |
| H | 1.33461500  | 2.36462300  | -1.36926900 |
| H | 0.57059100  | -0.05659800 | -2.15143900 |
| H | 3.12615500  | 0.09340500  | 1.14270500  |
| H | 3.10707900  | -0.05792800 | -1.24339000 |
| C | -0.04029900 | -1.99147600 | 0.02570500  |
| H | -0.27583900 | -2.38381700 | -0.96954500 |
| H | 0.90712000  | -2.43413000 | 0.32763000  |
| H | -0.79690300 | -2.37343600 | 0.71637400  |
| C | -2.33774400 | -0.76790000 | -0.99402200 |
| H | -2.45416500 | -1.81037400 | -0.68736500 |
| H | -3.34286900 | -0.34184300 | -1.08247900 |
| H | -1.88419200 | -0.75480000 | -1.99296500 |
| C | -2.11821700 | -0.10125800 | 1.41053300  |
| H | -3.19096600 | 0.12352000  | 1.38016200  |
| H | -2.00654000 | -1.11618600 | 1.80555200  |
| H | -1.65597300 | 0.59176000  | 2.12230200  |

|   |             |            |             |
|---|-------------|------------|-------------|
| C | -1.74464600 | 1.53525400 | -0.39521700 |
| H | -1.32332100 | 2.24602500 | 0.31640400  |
| H | -1.32982200 | 1.76420700 | -1.38313900 |
| H | -2.82720000 | 1.70646100 | -0.44049300 |

G: -468.916452

H: -468.869291

### 5-Methylcyclopentadiene

|   |             |             |             |
|---|-------------|-------------|-------------|
| C | 0.69672200  | 0.00006200  | 0.46349000  |
| C | -0.20560900 | -1.17468800 | 0.19087600  |
| C | -0.20574100 | 1.17472500  | 0.19084200  |
| H | 0.11493400  | 2.20734000  | 0.27887000  |
| H | 0.11526000  | -2.20727100 | 0.27857600  |
| H | 0.98379700  | 0.00018400  | 1.52753200  |
| C | -1.42366500 | -0.73610400 | -0.17666100 |
| H | -2.27774400 | -1.35140100 | -0.43816400 |
| C | -1.42369900 | 0.73597200  | -0.17686300 |
| H | -2.27776800 | 1.35131800  | -0.43828400 |
| C | 1.97313400  | 0.00000900  | -0.39011300 |
| H | 2.58069100  | 0.88631900  | -0.18239500 |
| H | 2.58064200  | -0.88632200 | -0.18233600 |
| H | 1.71334800  | -0.00001600 | -1.45322300 |

G: -233.269216

H: -233.234196

### 5-Methylcyclopentadiene + Ethylene TS (syn)

|   |             |             |             |
|---|-------------|-------------|-------------|
| C | 0.59005700  | -0.94441200 | -0.00051600 |
| C | -0.26983900 | -0.48866000 | -1.15302800 |
| C | -1.58852800 | -0.49517600 | -0.70319500 |
| C | -0.26950200 | -0.48991800 | 1.15268700  |
| C | -1.58831700 | -0.49586800 | 0.70328000  |
| C | 0.18981500  | 1.67166500  | -0.68951700 |
| C | 0.19034600  | 1.67108600  | 0.69058200  |
| H | 1.12116500  | 1.64065200  | -1.24807600 |
| H | 1.12208000  | 1.63936500  | 1.24845700  |
| H | 0.03100100  | -0.59864600 | 2.19104700  |
| H | -2.46593300 | -0.38895200 | 1.33168400  |
| H | -2.46633300 | -0.38760600 | -1.33122300 |
| H | 0.03021000  | -0.59652100 | -2.19161200 |
| H | -0.66017000 | 2.05946800  | 1.23896000  |
| H | -0.66100100 | 2.06068900  | -1.23697700 |
| H | 0.46062400  | -2.04392200 | -0.00122100 |
| C | 2.08804700  | -0.67944000 | -0.00033300 |
| H | 2.55090400  | -1.13111900 | -0.88437800 |
| H | 2.33408500  | 0.38381500  | 0.00076800  |

H 2.55089100 -1.13288800 0.88281200

G: -311.754167

H: -311.714886

**5-Methylcyclopentadiene + Ethylene Adduct (syn)**

|   |             |             |             |
|---|-------------|-------------|-------------|
| C | 0.70526300  | -0.81894800 | 0.00031800  |
| C | -0.15755700 | -0.19391400 | -1.12392100 |
| C | -0.15791400 | -0.19337800 | 1.12400500  |
| C | -0.05906800 | 1.32616500  | -0.77749700 |
| C | -0.05966000 | 1.32654000  | 0.77690300  |
| H | 0.86247300  | 1.75939500  | -1.17999800 |
| H | 0.86142500  | 1.76026200  | 1.17989200  |
| H | 0.11688800  | -0.44146600 | 2.15226000  |
| H | 0.11768500  | -0.44253300 | -2.15192900 |
| H | -0.89896100 | 1.88553000  | 1.19875100  |
| H | -0.89788100 | 1.88520600  | -1.20023800 |
| C | 2.18978900  | -0.47958700 | 0.00030200  |
| H | 2.67870500  | -0.90352700 | 0.88464100  |
| H | 2.67866000  | -0.90351300 | -0.88407600 |
| H | 2.38106700  | 0.59729100  | 0.00031700  |
| H | 0.58145200  | -1.90820100 | 0.00052700  |
| C | -1.53909600 | -0.62614200 | -0.66999700 |
| H | -2.38789900 | -0.78926600 | -1.32664000 |
| C | -1.53930700 | -0.62583000 | 0.66990700  |
| H | -2.38831500 | -0.78861700 | 1.32637300  |

G: -311.823403

H: -311.785688

## Kinetic Traces

Kinetic Traces for the Reaction of Maleimide with 1,2,3,4-Tetramethylcyclopentadiene

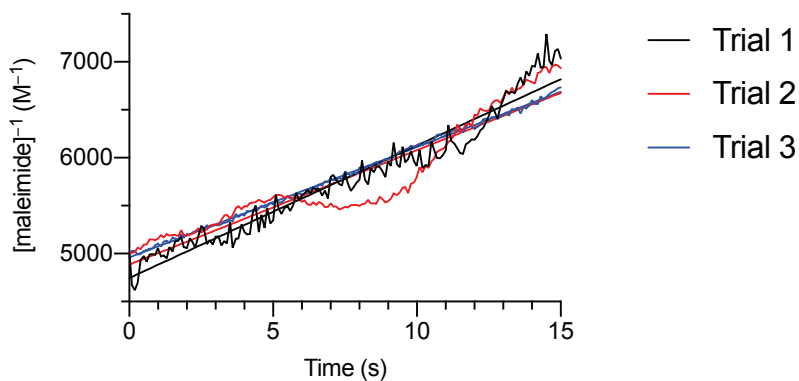

Kinetic Traces for the Reaction of Maleimide with 1,2,3,4,5-Pentamethylcyclopentadiene

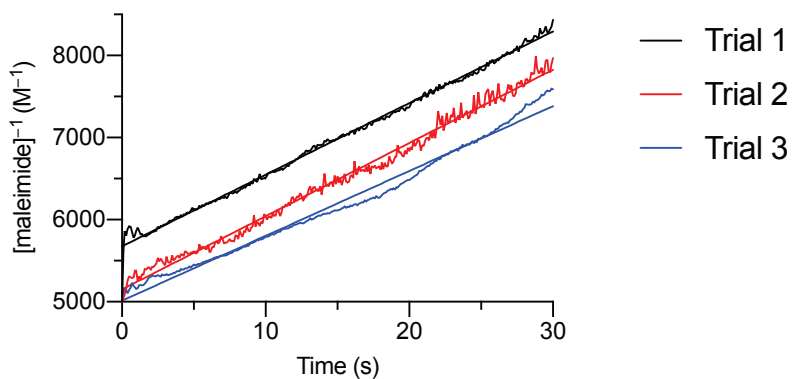

Kinetic Traces for the Reaction of Maleimide with 1,2,3,4,5,5-Hexamethylcyclopentadiene

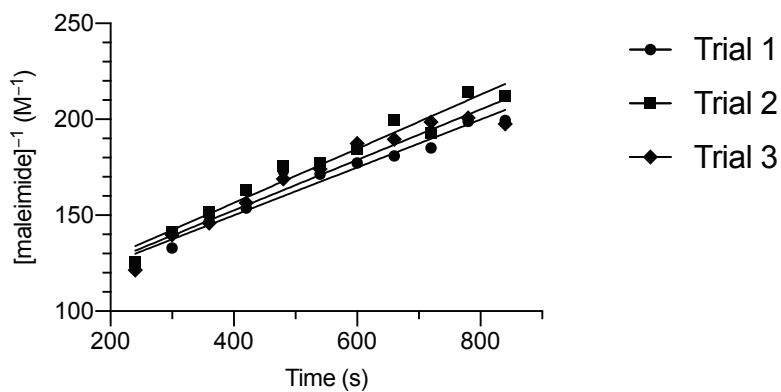

**NMR Spectra**<sup>1</sup>H NMR Spectrum of 1,2,3,4,5,5-Hexamethylcyclopentadiene in CDCl<sub>3</sub>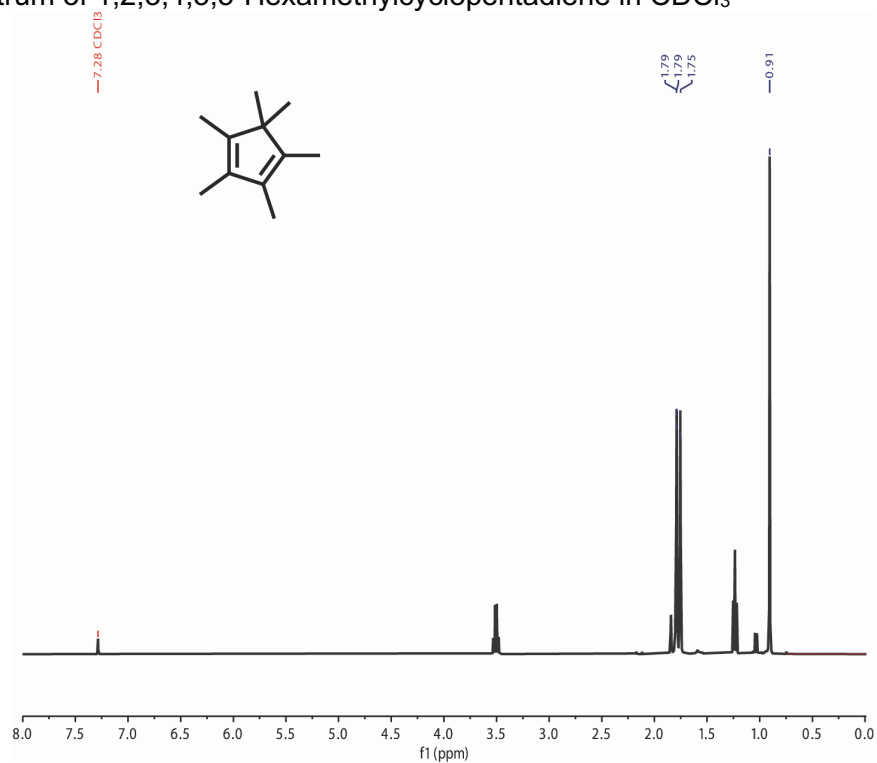<sup>13</sup>C NMR Spectrum of 1,2,3,4,5,5-Hexamethylcyclopentadiene in CDCl<sub>3</sub>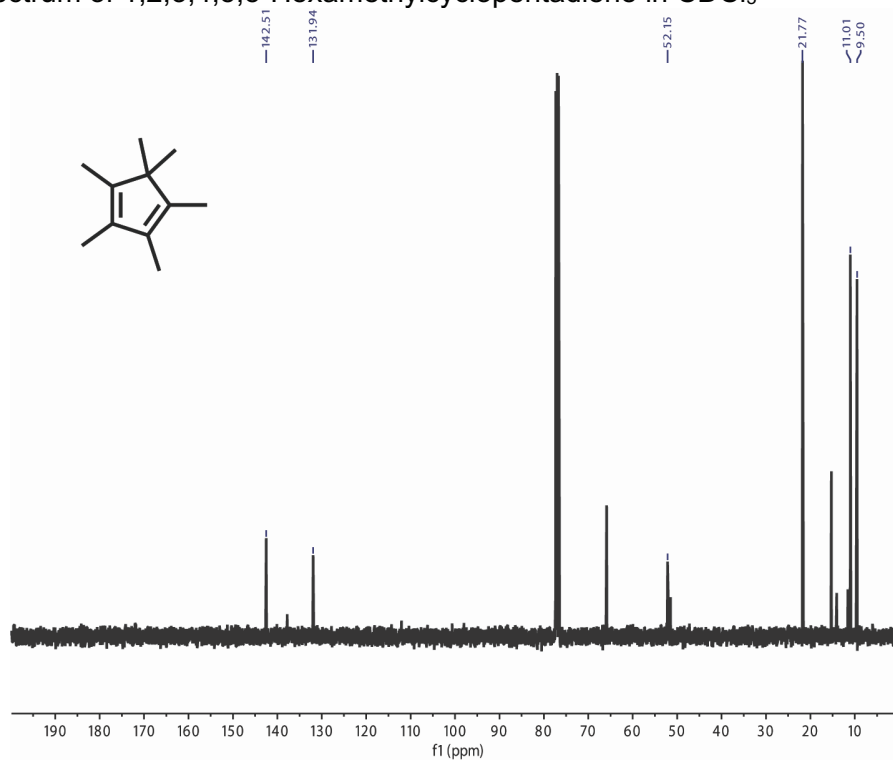

Supplement: NIHMS1711407-supplement-Supplementary_Data.pdf [file NIHMS1711407-supplement-Supplementary_Data.pdf]
